# Supplementary material for: Efficiency enhancement of dye-sensitized solar cells (DSSCs) using ligand exchanged CuInS2 NCs as counter electrode materials
Source: Royal Society of Chemistry journal article supplement (doi:10.1039/c3ra41602j), 2013-01-01
Supplement: c3ra41602j.pdf [file c3ra41602j.pdf]

Electronic Supplementary Information (ESI) for RSC Advances  
This journal is (c) The Royal Society of Chemistry 2013

## **Efficiency Enhancement of Dye-Sensitized Solar Cells (DSSCs) by Using Ligand Exchanged CuInS<sub>2</sub> NCs as Counter Electrode Materials**

Jie Guo, Xiang Wang, Wen-Hui Zhou\*, Rong-Yue Yao, Zhi-Xian Chang, Xia Wang, Zheng-Ji  
Zhou, and Si-Xin Wu\*

The Key Laboratory for Special Functional Materials of MOE, Henan University, Kaifeng 475004, China

\*Corresponding author. Tel/fax number: +86-378-3881358

E-mail address: zhouwh@henu.edu.cn, wusixin@henu.edu.cn

### **Contents:**

**Fig. S1** TEM images of CuInS<sub>2</sub> NCs before (a) and after (b) ligand exchanged.

**Fig. S2** XRD patterns of the CuInS<sub>2</sub> NCs before (a) and after (b) ligand exchange.

**Fig. S3** Cyclic voltammograms of different electrodes with a scan rate of 10 mV/s.

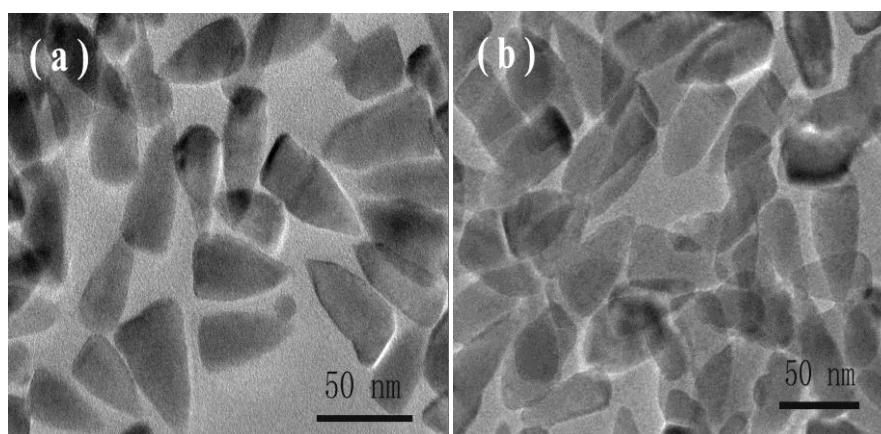

**Fig. S1** TEM images of CuInS<sub>2</sub> NCs before (a) and after (b) ligand exchanged.

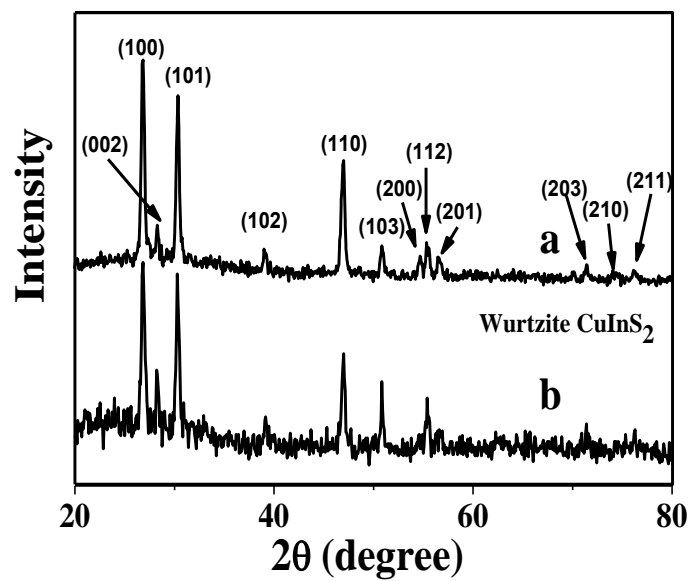

**Fig. S2** XRD patterns of the CuInS<sub>2</sub> NCs before (a) and after (b) ligand exchange.

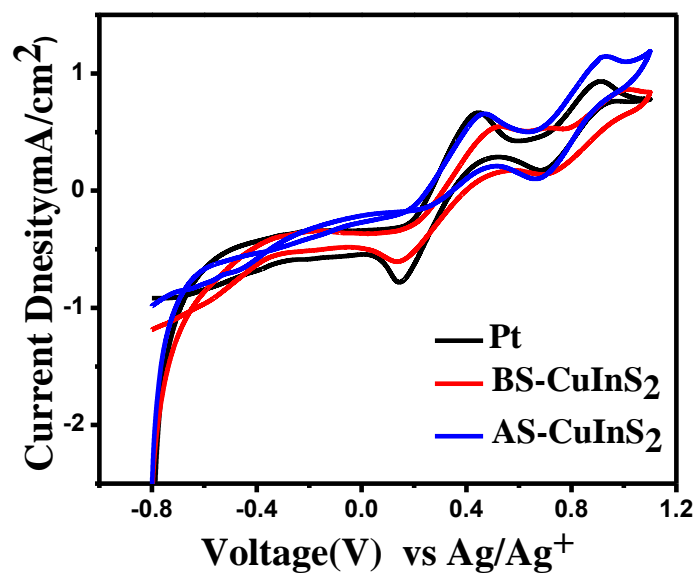

**Fig. S3** Cyclic voltammograms of different electrodes with a scan rate of 10 mV/s.
